# Supplementary material
Source: publisher figshare collection journal article supplement (https://tandf.figshare.com/articles/dataset/_/7271054)
Supplement: Supplementary file 1 [file 1]

**Supplementary Table 2.**

**Baseline characteristics comparing treated and non-treated patients**

| Variable | Category | Treated | | Non-treated | | *P* |
| --- | --- | --- | --- | --- | --- | --- |
| *N*=557 | % | *N*=97 | % |
| Age * | Years | 68 (50–89) |  | 75 (50–87) |  | **<0.001** |
| Body Mass Index * | kg/m2 | 24.2 (13.2–46.2) |  | 23.4 (14.5–39.2) |  | 0.09 |
| Sex | Men  Women | 301  256 | 54  46 | 49  48 | 51  49 | 0.60 |
| Performance status | 0  1  2+ | 339  164  54 | 61  29  9.7 | 8  14  75 | 8.2  14  77 | **<0.001** |
| Charlson comorbidity score | 0  1–2  3+ | 334  187  36 | 60  34  6.5 | 45  39  13 | 46  40  13 | **0.011** |
| Medication | 0  1–3  4–5  6–7  8+ | 126  231  99  68  33 | 23  42  18  12  5.9 | 5  34  22  22  14 | 5.2  35  23  23  14 | **<0.001** |
| Civil status | Single  Living together | 157  400 | 28  72 | 43  54 | 45  55 | **0.002** |
| Primary localization of tumor | Right  Left  Rectum | 177  210  161 | 32  38  29 | 40  31  23 | 43  33  25 | 0.15 |
| Disease at time of diagnosis | Synchronous  Recurrence  Unresectable | 379  173  5 | 68  31  0.9 | 63  31  3 | 65  32  3.1 | 0.18 |
| Previous adjuvant chemotherapy | Yes  No | 135  422 | 24  76 | 14  83 | 14  86 | **0.046** |
| Hemoglobin * | mmol/L | 6.30 (4.00–9.50) |  | 7.80 (4.40–10.40) |  | **<0.001** |
| Leucocytes * | 109/L | 10.20 (1.40–31.10) |  | 7.40 (0.7–119.00) |  | **<0.001** |
| LDH * | U/L | 294 (127–3220) |  | 207 (87–5720) |  | **0.008** |
| CEA * | μg/L | 10 (1–704) |  | 14 (1–7950) |  | 0.95 |

*median (range)
