# Supplementary material
Source: publisher figshare collection journal article supplement (https://tandf.figshare.com/articles/dataset/_/7271054)

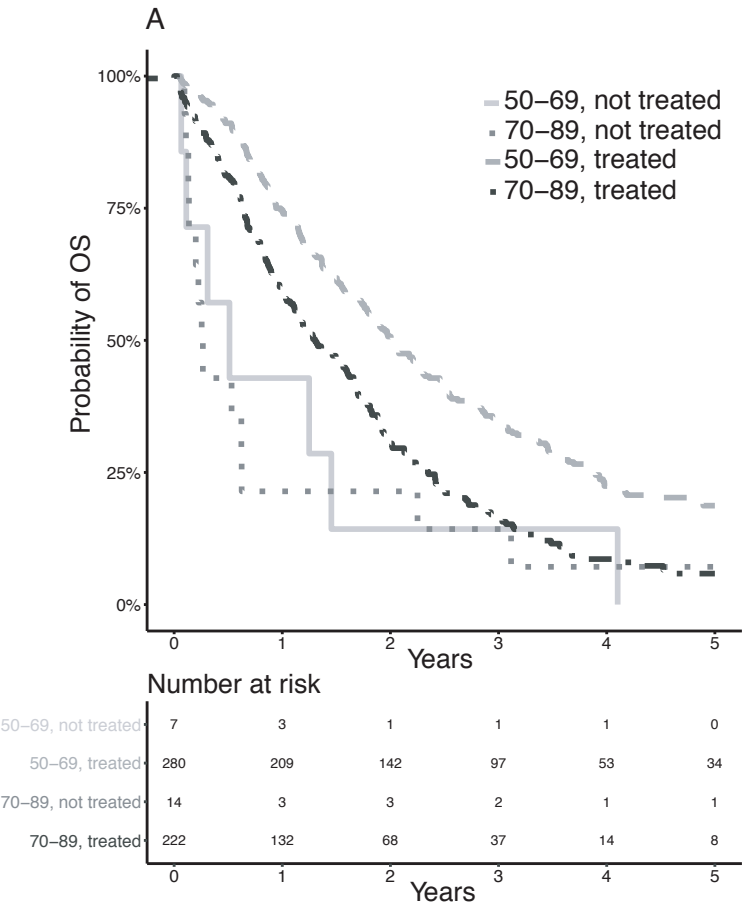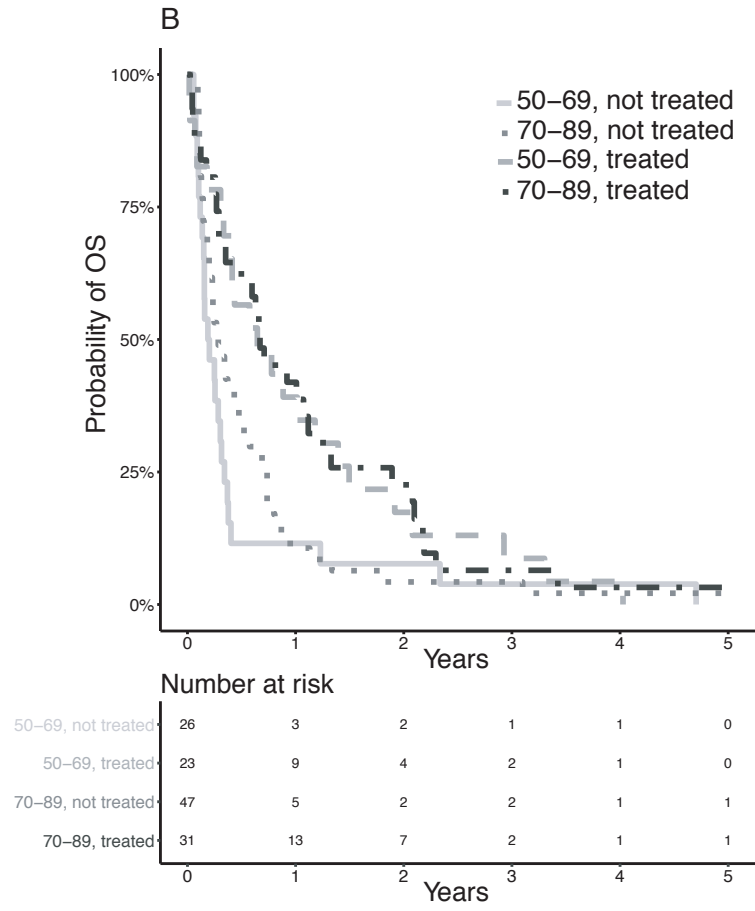

Supplement: Supplementary file 1 [file 1]

A

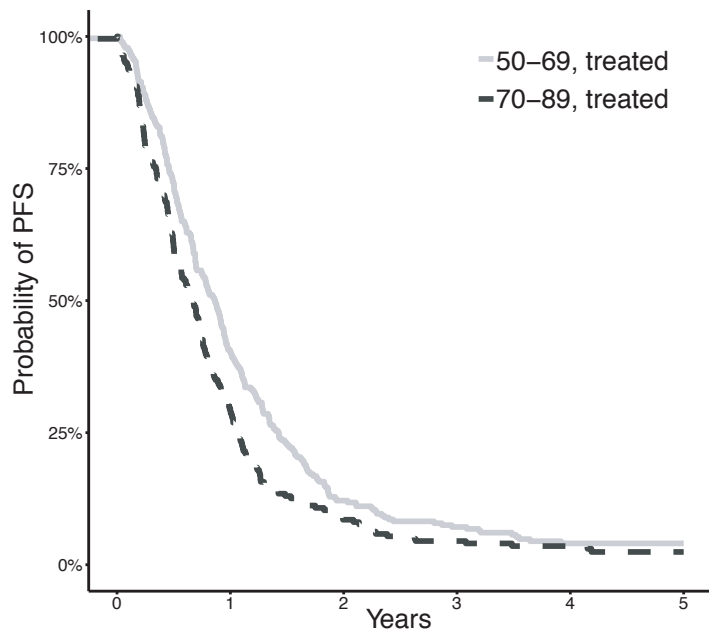

Number at risk

|                |     |     |    |    |    |   |
|----------------|-----|-----|----|----|----|---|
| 50–69, treated | 279 | 113 | 34 | 20 | 10 | 8 |
| 70–89, treated | 222 | 65  | 19 | 10 | 7  | 4 |

B

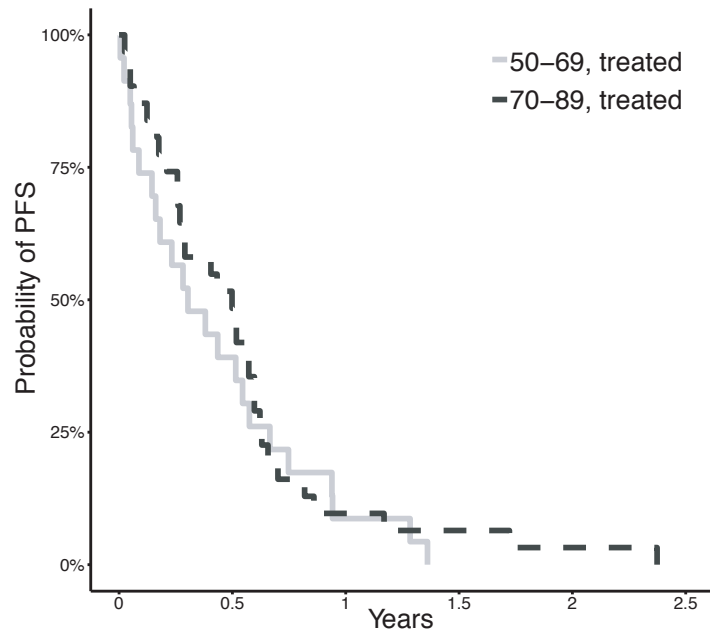

Number at risk

|                |    |    |   |   |   |   |
|----------------|----|----|---|---|---|---|
| 50–69, treated | 23 | 9  | 2 | 0 | 0 | 0 |
| 70–89, treated | 31 | 15 | 3 | 2 | 1 | 0 |

Supplement: Supplementary file 2 [file 1]
